# Supplementary material
Source: PubMed Central journal article supplement (PMC6885115)

Supplementary Figure 1

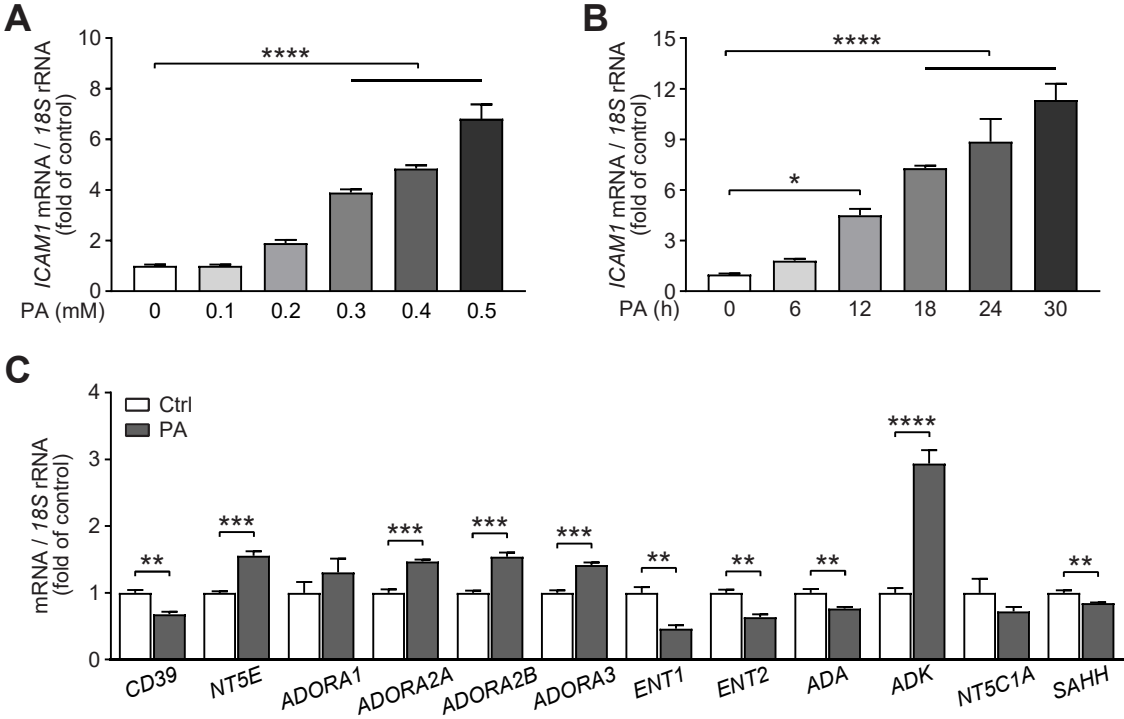

Supplement: NIHMS1532623-supplement-04.pdf [file NIHMS1532623-supplement-04.pdf]

Supplementary Figure 2

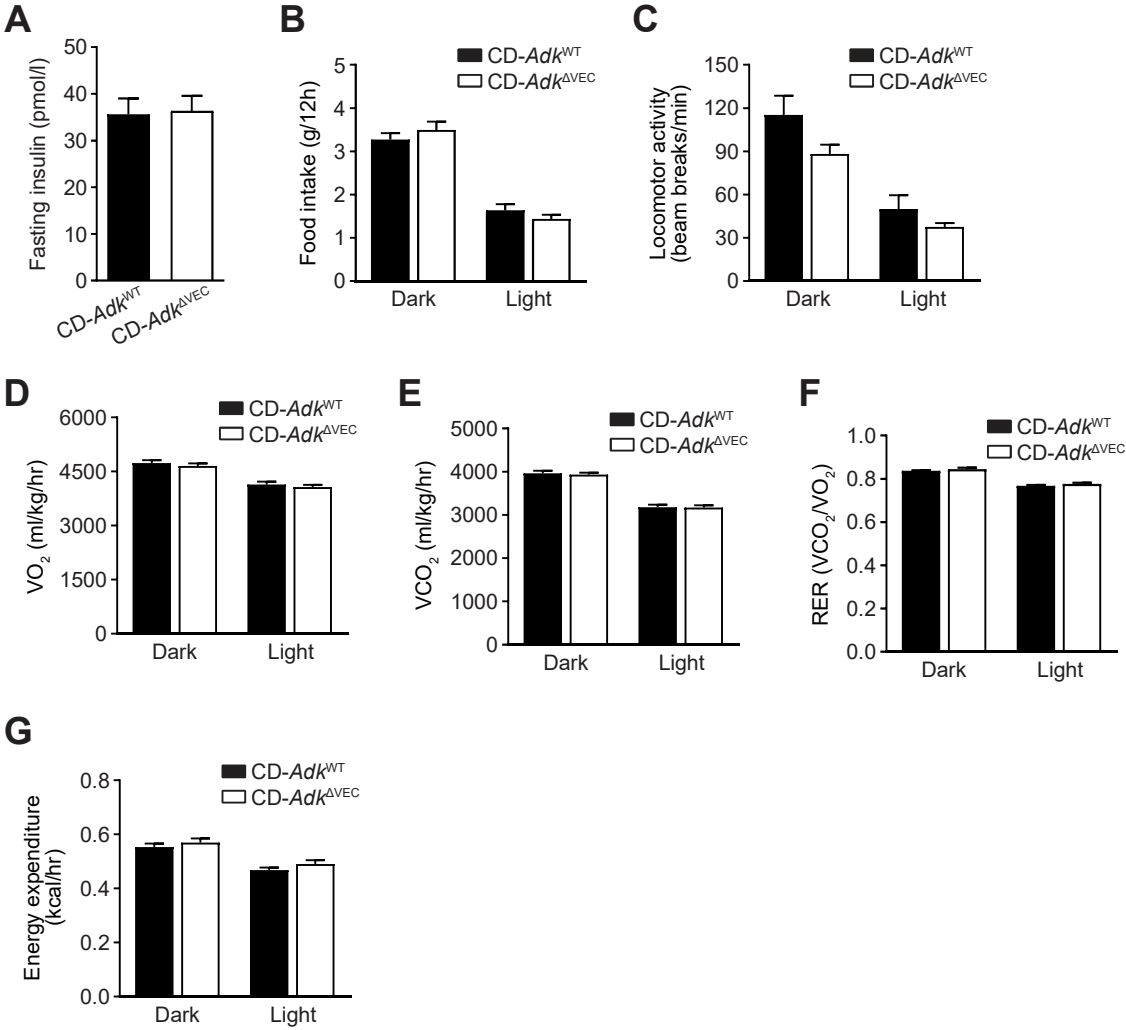

Supplement: NIHMS1532623-supplement-05.pdf [file NIHMS1532623-supplement-05.pdf]

### Supplementary Figure 3

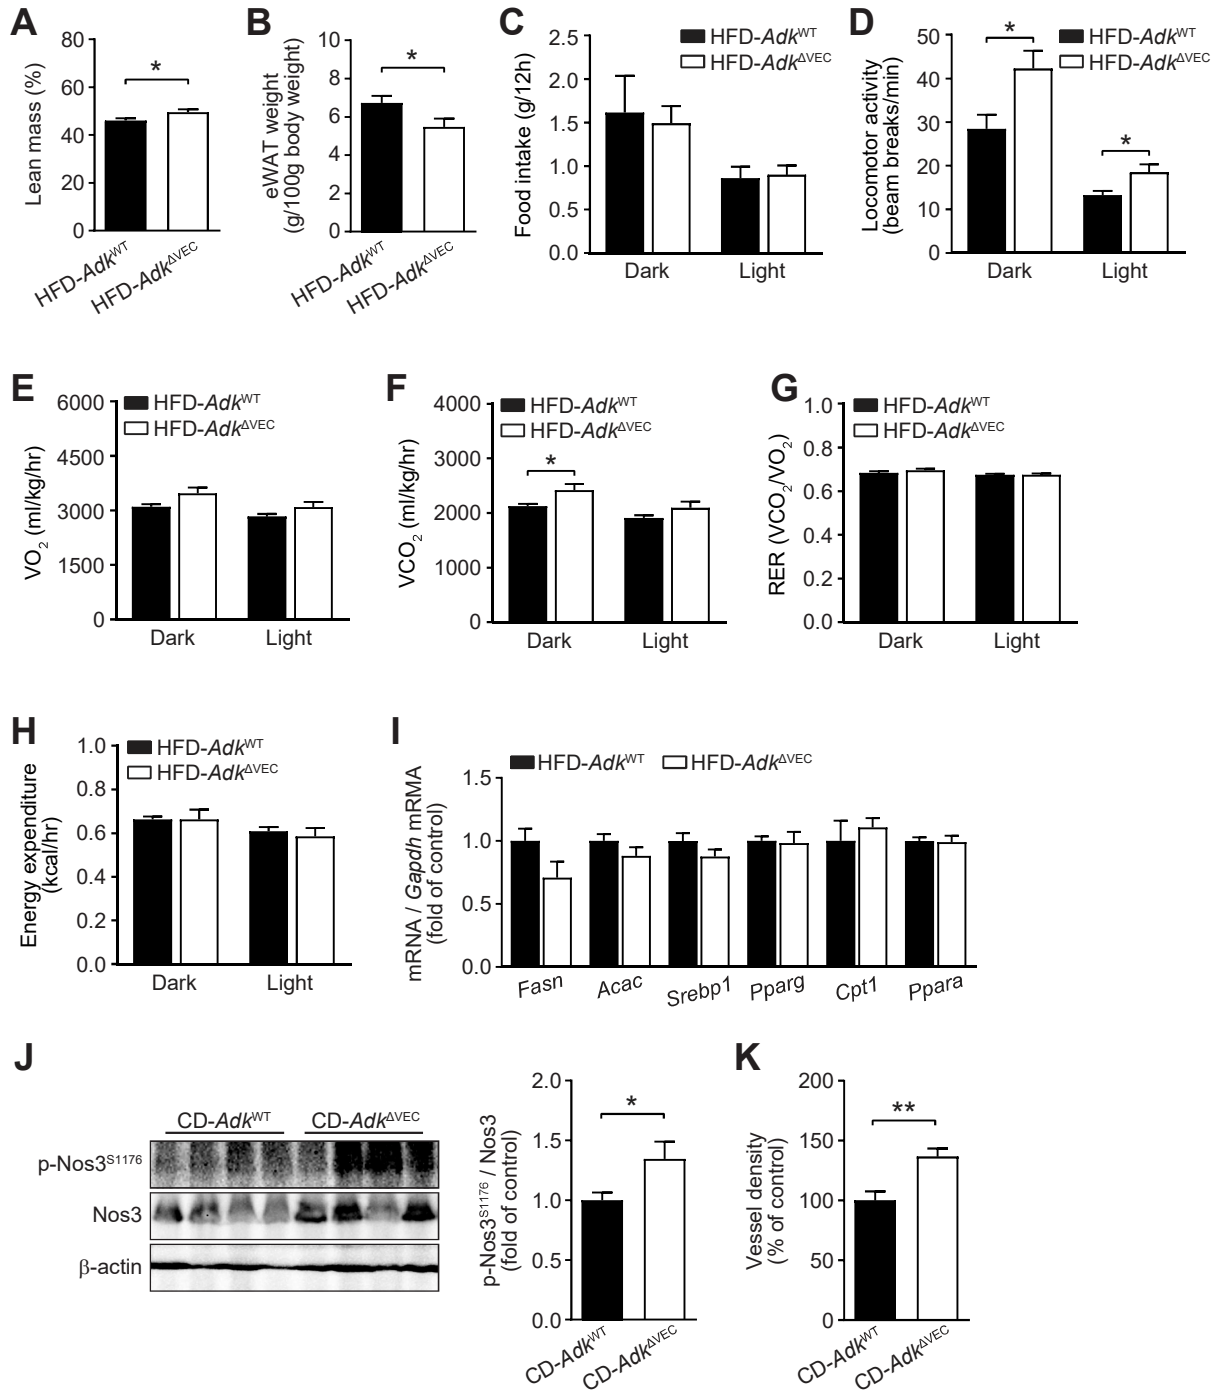

Supplement: NIHMS1532623-supplement-06.pdf [file NIHMS1532623-supplement-06.pdf]

Supplementary Figure 4

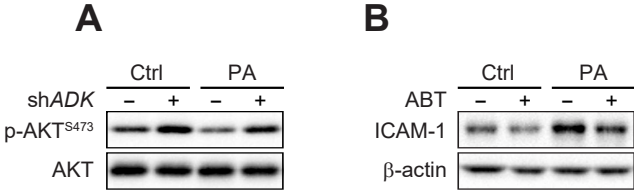

Supplement: NIHMS1532623-supplement-07.pdf [file NIHMS1532623-supplement-07.pdf]
